# Supplementary material for: Superovulatory responses in cynomolgus monkeys (Macaca fascicularis) depend on the interaction between donor status and superovulation method used
Source: PubMed Central journal article supplement — J Reprod Dev. 2017 Jan 9;63(2):149–55. doi: 10.1262/jrd.2016-074 (PMC5401808; doi:10.1262/jrd.2016-074), 2017-01-09
Supplement: jrd-63-149-s001.pdf [file jrd-63-149-s001.pdf]

**Supplementary Table 1.** Changes in ovary size in females of different ages after superovulation stimulation by Method A

| Age (Month) | No. of animals | Left ovary              |                         | Right ovary               |                           |
|-------------|----------------|-------------------------|-------------------------|---------------------------|---------------------------|
|             |                | Length (mm)             | Width (mm)              | Length (mm)               | Width (mm)                |
| 40–45       | 4              | 14.5 ± 3.8 <sup>a</sup> | 11.4 ± 2.2 <sup>a</sup> | 14.2 ± 5.9 <sup>a</sup>   | 10.7 ± 3.1 <sup>a</sup>   |
| 45–50       | 4              | 16.3 ± 2.3 <sup>a</sup> | 10.5 ± 2.4 <sup>a</sup> | 17.3 ± 2.8 <sup>a,c</sup> | 12.6 ± 1.5 <sup>a</sup>   |
| 50–60       | 5              | 26.2 ± 4.2 <sup>b</sup> | 18.8 ± 3.7 <sup>b</sup> | 23.8 ± 3.8 <sup>b,c</sup> | 16.6 ± 4.5 <sup>a,b</sup> |
| > 60        | 4              | 28.7 ± 5.4 <sup>b</sup> | 21.7 ± 4.4 <sup>b</sup> | 26.8 ± 4.8 <sup>b,d</sup> | 19.3 ± 1.5 <sup>b,c</sup> |

Data are the mean ± S.D. Values with different superscript letters within a column differ significantly ( $P < 0.05$ ).

**Supplementary Table 2.** Changes in ovary size in females of different body weights after superovulation stimulation by Method A

| Body weight (kg) | No. of animals | Left ovary                |                           | Right ovary               |                           |
|------------------|----------------|---------------------------|---------------------------|---------------------------|---------------------------|
|                  |                | Length (mm)               | Width (mm)                | Length (mm)               | Width (mm)                |
| 2.5–3.0          | 5              | 14.4 ± 4.5 <sup>a</sup>   | 9.9 ± 2.8 <sup>a</sup>    | 14.7 ± 6.5 <sup>a</sup>   | 10.4 ± 2.8 <sup>a</sup>   |
| 3.0–3.5          | 6              | 18.1 ± 4.7 <sup>a,b</sup> | 13.7 ± 5.0 <sup>a,b</sup> | 18.0 ± 4.1 <sup>a,b</sup> | 13.7 ± 3.4 <sup>a,b</sup> |
| 3.5–4.0          | 3              | 23.3 ± 1.5 <sup>b</sup>   | 16.6 ± 1.1 <sup>b</sup>   | 22.2 ± 1.1 <sup>b</sup>   | 18.2 ± 0.7 <sup>b</sup>   |
| 4.5–5.0          | 3              | 25.7 ± 4.9 <sup>b</sup>   | 20.5 ± 4.2 <sup>b</sup>   | 27.8 ± 2.8 <sup>b</sup>   | 17.7 ± 1.5 <sup>b</sup>   |

Data are the mean ± S.D. Values with different superscript letters within a column differ significantly ( $P < 0.05$ ).

**Supplementary Table 3.** The number and proportion of oocytes retrieved from females of different ages after superovulation stimulation by Method A

| Age (month) | No. of animals | No. of oocytes at |                            |                            | Proportion of oocytes at |                          |
|-------------|----------------|-------------------|----------------------------|----------------------------|--------------------------|--------------------------|
|             |                | GV                | MII                        | Total                      | GV                       | MII                      |
| 40–45       | 5              | 16.5 ± 7.5        | 0.2 ± 0.4 <sup>a</sup>     | 16.7 ± 7.3 <sup>a</sup>    | 98.0 ± 4.0 <sup>a</sup>  | 2.0 ± 4.0 <sup>a</sup>   |
| 45–50       | 5              | 10.6 ± 3.7        | 7.8 ± 5.5 <sup>a,b</sup>   | 18.4 ± 2.6 <sup>a</sup>    | 59.4 ± 21.9 <sup>b</sup> | 40.6 ± 21.9 <sup>b</sup> |
| 50–60       | 7              | 14.0 ± 12.9       | 15.7 ± 11.4 <sup>b,d</sup> | 29.7 ± 14.0 <sup>a,b</sup> | 44.1 ± 31.8 <sup>b</sup> | 55.9 ± 31.8 <sup>b</sup> |
| > 60        | 4              | 9.5 ± 4.7         | 28.5 ± 2.5 <sup>c,d</sup>  | 38.0 ± 2.4 <sup>b</sup>    | 28.9 ± 6.6 <sup>b</sup>  | 71.1 ± 6.6 <sup>b</sup>  |

Data are the mean ± S.D. Values with different superscript letters within a column differ significantly ( $P < 0.05$ ).

**Supplementary Table 4.** The number and proportion of oocytes retrieved from females of different body weights after superovulation stimulation by Method A

| Body weight (kg) | No. of animals | No. of oocytes at |                         |                            | Proportion of oocytes at |             |
|------------------|----------------|-------------------|-------------------------|----------------------------|--------------------------|-------------|
|                  |                | GV                | MII                     | Total                      | GV                       | MII         |
| 2.5–3.0          | 8              | 7.4 ± 4.6         | 3.2 ± 5.4 <sup>a</sup>  | 10.6 ± 7.2 <sup>a</sup>    | 79.0 ± 26.7              | 21.0 ± 26.7 |
| 3.0–3.5          | 11             | 12.9 ± 4.0        | 7.4 ± 8.4 <sup>a</sup>  | 20.2 ± 9.1 <sup>a</sup>    | 70.6 ± 24.5              | 29.3 ± 24.5 |
| 3.5–4.0          | 5              | 16.5 ± 16.8       | 9.0 ± 3.1 <sup>a</sup>  | 25.5 ± 17.9 <sup>a,b</sup> | 47.9 ± 38.2              | 42.8 ± 38.2 |
| 4.5–5.0          | 5              | 13.2 ± 9.9        | 31.0 ± 9.1 <sup>b</sup> | 44.2 ± 8.1 <sup>b,c</sup>  | 35.4 ± 31.3              | 64.6 ± 33.6 |

Data are the mean ± S.D. Values with different superscript letters within a column differ significantly ( $P < 0.05$ ).

**Supplementary Table 5.** Changes in ovary size in females of different ages after superovulation stimulation by Method B

| Age (Month) | No. of animals | Left ovary  |            | Right ovary |            |
|-------------|----------------|-------------|------------|-------------|------------|
|             |                | Length (mm) | Width (mm) | Length (mm) | Width (mm) |
| 40–45       | 4              | 24.2 ± 0.9  | 17.7 ± 2.4 | 20.8 ± 2.3  | 18.4 ± 3.6 |
| 45–50       | 4              | 25.0 ± 4.5  | 17.5 ± 3.2 | 22.9 ± 5.3  | 20.8 ± 5.4 |
| 50–60       | 3              | 26.1 ± 10.9 | 17.5 ± 7.4 | 22.9 ± 7.7  | 20.8 ± 7.7 |
| > 60        | 6              | 24.5 ± 3.6  | 17.3 ± 3.2 | 21.2 ± 2.0  | 16.3 ± 2.0 |

Data are the mean ± S.D.

**Supplementary Table 6.** Changes in ovary size in females of different body weights after superovulation stimulation by Method B

| Body weight (kg) | No. of animals | Left ovary  |            | Right ovary |            |
|------------------|----------------|-------------|------------|-------------|------------|
|                  |                | Length (mm) | Width (mm) | Length (mm) | Width (mm) |
| 2.5–3.0          | 4              | 21.9 ± 3.9  | 16.6 ± 4.0 | 20.8 ± 3.0  | 16.3 ± 3.6 |
| 3.0–3.5          | 6              | 26.8 ± 3.5  | 19.8 ± 2.6 | 26.1 ± 5.7  | 20.3 ± 3.7 |
| 3.5–4.0          | 4              | 26.4 ± 8.2  | 17.5 ± 5.6 | 23.3 ± 5.7  | 20.7 ± 8.7 |
| 4.5–5.0          | 3              | 25.7 ± 2.9  | 17.7 ± 3.3 | 20.5 ± 0.8  | 15.2 ± 2.0 |

Data are the mean ± S.D.

**Supplementary Table 7.** The number and proportion of oocytes retrieved from females of different ages after superovulation stimulation by Method B

| Age (month) | No. of animals | No. of oocytes at        |             |                            | Proportion of oocytes at |             |
|-------------|----------------|--------------------------|-------------|----------------------------|--------------------------|-------------|
|             |                | GV                       | MII         | Total                      | GV                       | MII         |
| 40–45       | 4              | 11.8 ± 6.0 <sup>a</sup>  | 22.0 ± 4.1  | 33.8 ± 8.4 <sup>a,c</sup>  | 33.1 ± 12.6              | 66.9 ± 12.6 |
| 45–50       | 3              | 29.3 ± 11.7 <sup>b</sup> | 22.3 ± 17.6 | 51.7 ± 18.5 <sup>a,b</sup> | 59.0 ± 27.5              | 41.0 ± 27.5 |
| 50–60       | 3              | 5.0 ± 4.4 <sup>a</sup>   | 18.0 ± 5.0  | 23.0 ± 8.9 <sup>c</sup>    | 18.0 ± 16.1              | 82.0 ± 16.1 |
| > 60        | 6              | 8.3 ± 7.0 <sup>a</sup>   | 11.0 ± 8.1  | 19.3 ± 10.6 <sup>c</sup>   | 52.4 ± 32.1              | 47.6 ± 32.1 |

Data are the mean ± S.D. Values with different superscript letters within a column differ significantly ( $P < 0.05$ ).**Supplementary Table 8.** The number and proportion of oocytes retrieved from females of different body weights after superovulation stimulation by Method B

| Body weight (kg) | No. of animals | No. of oocytes at |             |             | Proportion of oocytes at |             |
|------------------|----------------|-------------------|-------------|-------------|--------------------------|-------------|
|                  |                | GV                | MII         | Total       | GV                       | MII         |
| < 2.5            | 4              | 7.5 ± 8.1         | 21.8 ± 7.5  | 29.3 ± 14.7 | 23.1 ± 26.6              | 79.5 ± 14.3 |
| 2.5–3.0          | 6              | 19.2 ± 11.8       | 15.2 ± 9.7  | 34.4 ± 9.6  | 42.0 ± 29.0              | 58.0 ± 29.0 |
| 3.0–3.5          | 5              | 13.2 ± 13.9       | 18.4 ± 14.8 | 31.6 ± 25.8 | 49.7 ± 36.5              | 50.3 ± 36.5 |
| 3.5–4.0          | 3              | 8.3 ± 1.2         | 12.0 ± 7.0  | 20.3 ± 8.1  | 45.3 ± 15.9              | 54.7 ± 15.9 |

Data are the mean ± S.D.
